# Supplementary material
Source: PubMed Central journal article supplement (PMC2785351)

## SUPPLEMENTAL EXPERIMENTAL PROCEDURES

*Primers and PCR conditions to amplify LIG gene* – Primers used to amplify through the 46BR mutation (Arg-771 to Trp mutation) were: *46BR-F* (5'-CCTTCTTCATCTCTTGCCTCC-3') and *46BR-R* (5'-CCTCCTGCTTCTGCCATCAG-3'). Likewise, the four pair primers used to amplify over all the cDNA *LIG1* gene were from 5' to 3': *LIG8-F* (5'-ATGCAGCGAAGTATCATG-3') and *CLIG1.1R* (5'-GCTCCTCTCCTTCACTTCT-3'); *CLIG1.2F* (5'-AAGACGCTCAGCAGCTTCTT-3') and *CLIG1.2R* (5'-TTCTGGCCTCTGCTGTCTTG-3'); *CLIG1.3F* (5'-CAAGACAGCAGAGGCCAGAA-3') and *CLIG1.3R* (5'-TTCAGTACTGCTCCAGGAA-3'); and *CLIG1.4F* (5'-CTGGACACCAAGGACATCGA-3') and *CLIG1.4R* (5'-GAGTCCTCGCCTTGTTGGTT-3'). DNA sequence changes that replace adjacent phenylalanine residues with alanine residues within the conserved PCNA interaction motif encoded by the mutant hLigI<sup>m/m;wt-PCNA</sup> cell line (8,9 aa location) were checked in the *LIG8-F/CLIG1.1R* fragment sequencing that enclose the 5' sequence of the *LIG1* gene. All PCRs were performed with a 50°C primer annealing temperature.

## SUPPLEMENTAL FIGURE LEGENDS

**Supplemental Fig. 1.** Magnitude of repeat tract length changes following replication by different hLigI backgrounds.

**Supplemental Fig. 2.** Schematic of slipped-strand substrates. Contraction intermediates (slip-outs in the continuous strand) and expansion intermediates (slip-outs in the nicked strand), with slipped (CTG)<sub>30</sub>•(CAG)<sub>50</sub> or (CTG)<sub>50</sub>•(CAG)<sub>30</sub> repeats, having an excess of CAG or CTG repeats and a unique nick at the *EcoRI* (*E*) or *HindIII* (*H*) site. As indicated, nicks are located 5' or 3' of the slip-out (43).

**Supplemental Fig 3.** Repair tract size differences for each slipped-DNA substrate when repaired by each of the various hLigI backgrounds. Repair products were processed as outlined in **Fig. 4**. Briefly, following repair products were digested with *EcoRI* and *DdeI* enzymes and resolved on native acrylamide gels. The relative incorporation/bp into each fragment, normalized to the 540-bp fragment (opposite the repeat), was determined by densitometric analysis. The relative repair-incorporation into the fragments upstream (1,124 bp) and downstream (709 bp) of the repeat tract is shown. Results reproducibility was performed only for substrates 3 and 8 in combination with all the different hLigI extracts used (average of three independent set of repair reactions); only one repair reaction was performed for the rest of the repair substrates.

**Supplemental Fig. 4.** Repair levels for each slipped-DNA by the various hLigI extracts. Three independent set of repair assays were performed to each substrate and hLigI extracts.

**Supplemental Fig. 5.** Replication-mediated instability and repair efficiencies after specific F-Ara-ATP inhibition of hLigI activity (56). (A) 46BRLigI<sup>m/m</sup> *in vitro* replication analysis with and without F-ara-ATP (200 μM) using trinucleotide repeat templates pDM79EF and pDM79HF. Reduced replication levels were observed after inhibitor treatment. (B) Molecule length distributions were not significantly different with the inclusion of F-ara-ATP (ns, Fisher's test, p<0.05). (C) Repair efficiencies after F-ara-ATP inhibitor treatment on 46BRLigI extracts and substrate 1. Equal or decreased repair levels were observed. Results were normalized against 46BRLigI<sup>m/m</sup> extract repair level. In contrast, experiments using the hLigI diluted extract (46BRLigI<sup>m/m;wt</sup> : 46BRLigI<sup>m/m</sup> extract, 1:16 mixture) showed increased repair efficiency.

Supplemental Fig. 1 López et al.

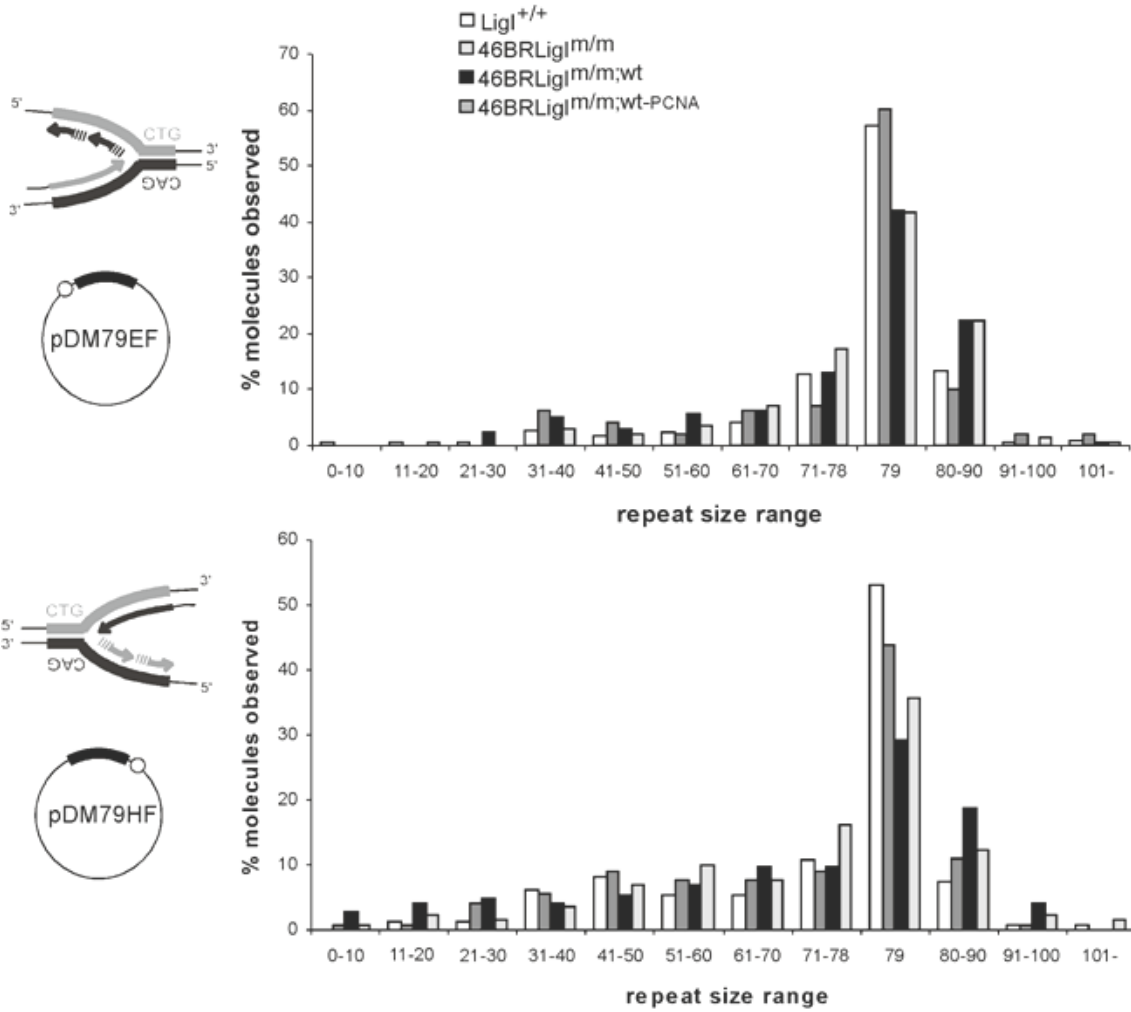

## Slipped Substrates

30 X 50; slip-outs of 20 repeats

slip-outs in template/continuous strand

Contraction substrates

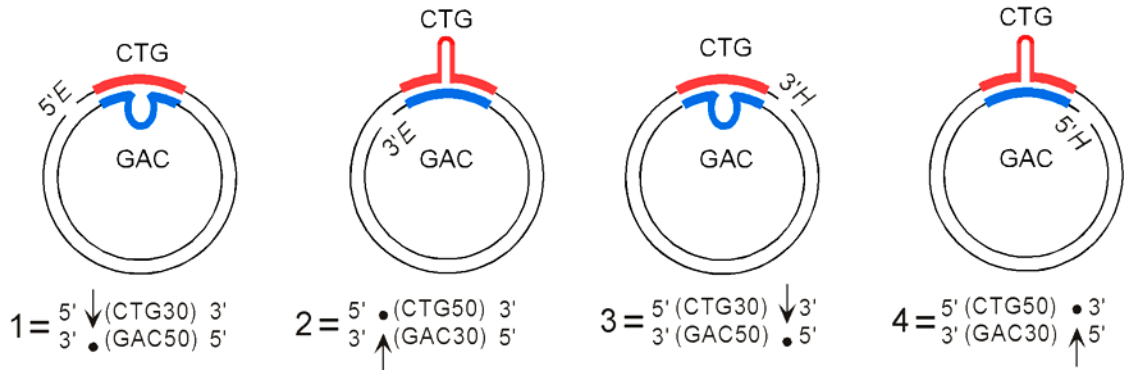

slip-outs in nascent/nicked strand

Expansion substrates

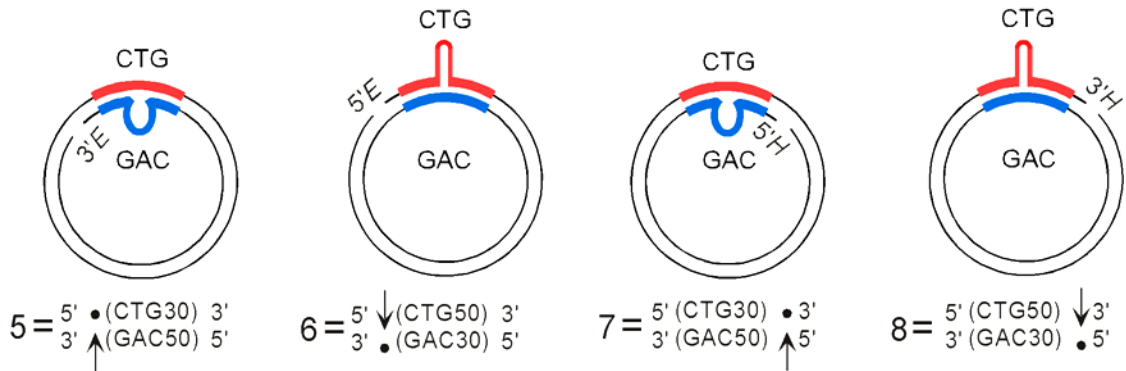

Supplemental Fig. 3 López et al.

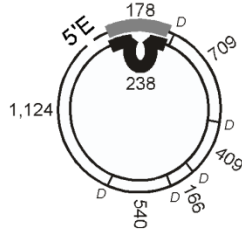

Substrates

Contraction

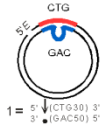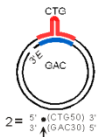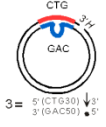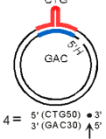

Expansion

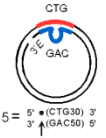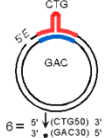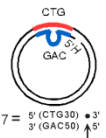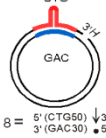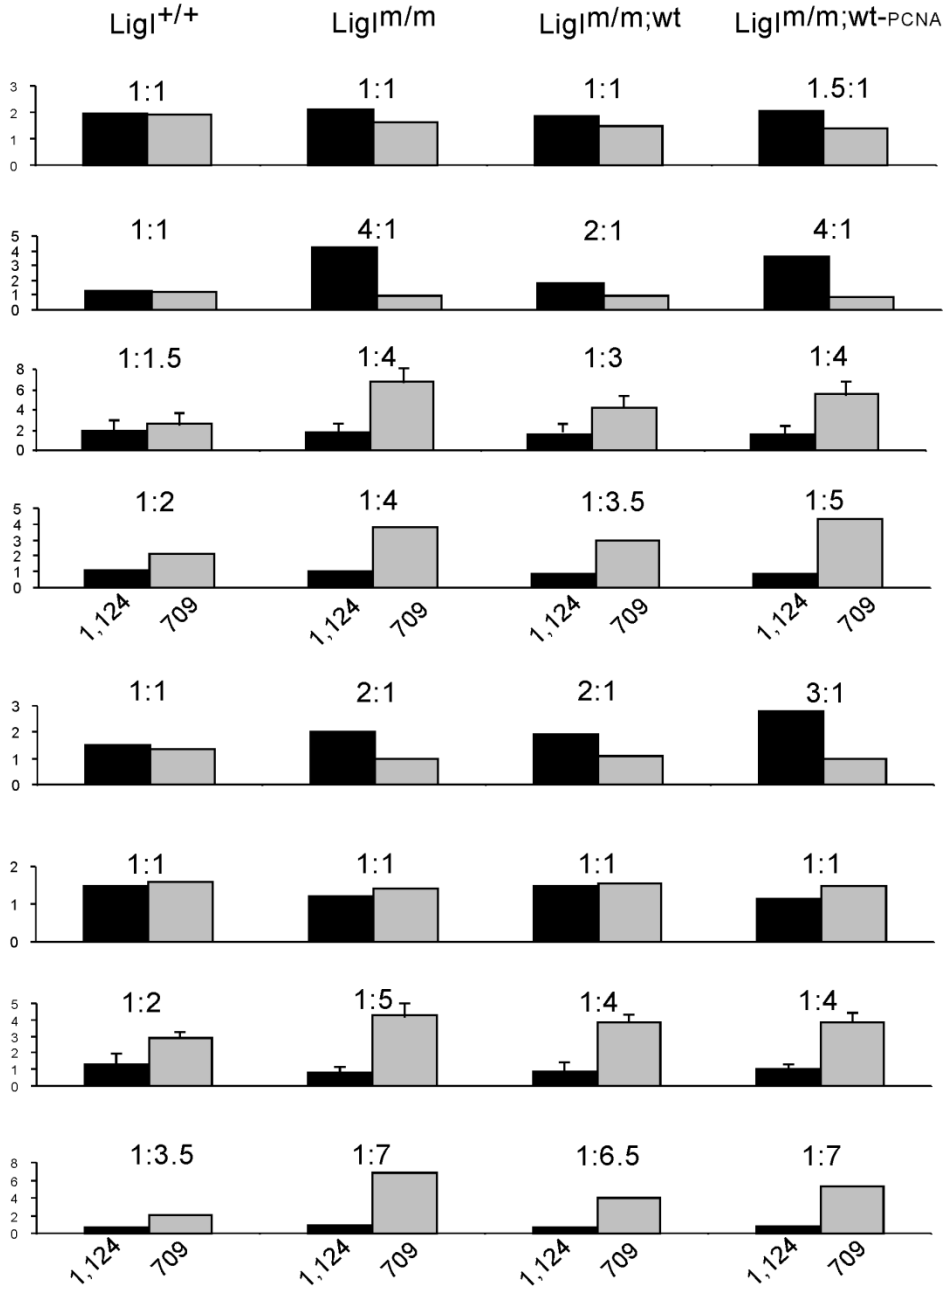

Radioactivity / base pair

Radioactivity / base pair

Supplemental Fig. 4 López et al.

contraction substrates

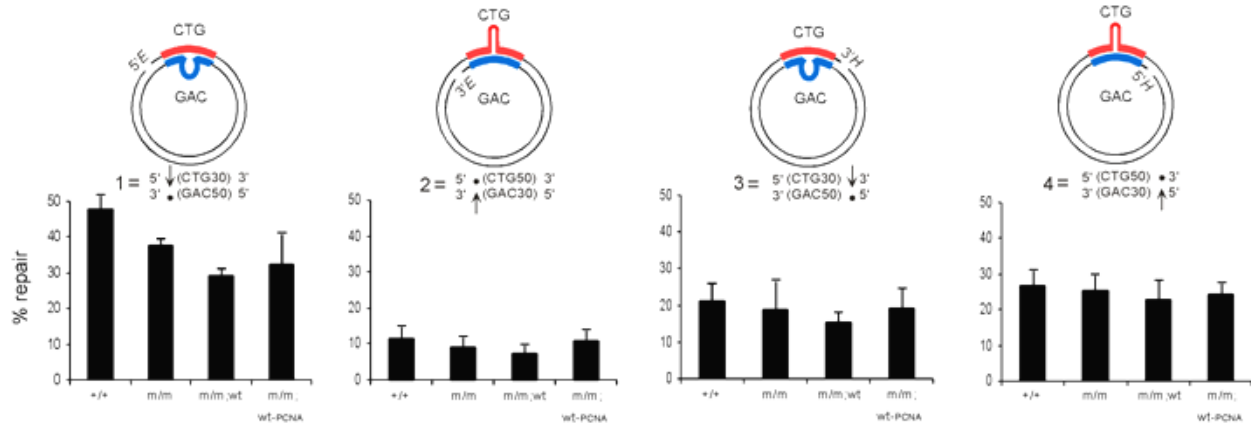

expansion substrates

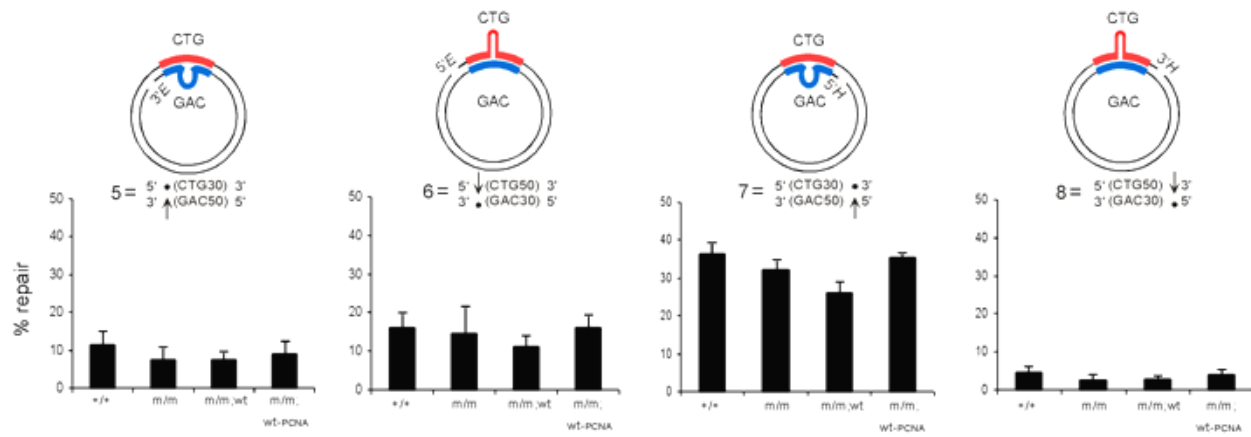

Supplemental Fig. 5 López et al.

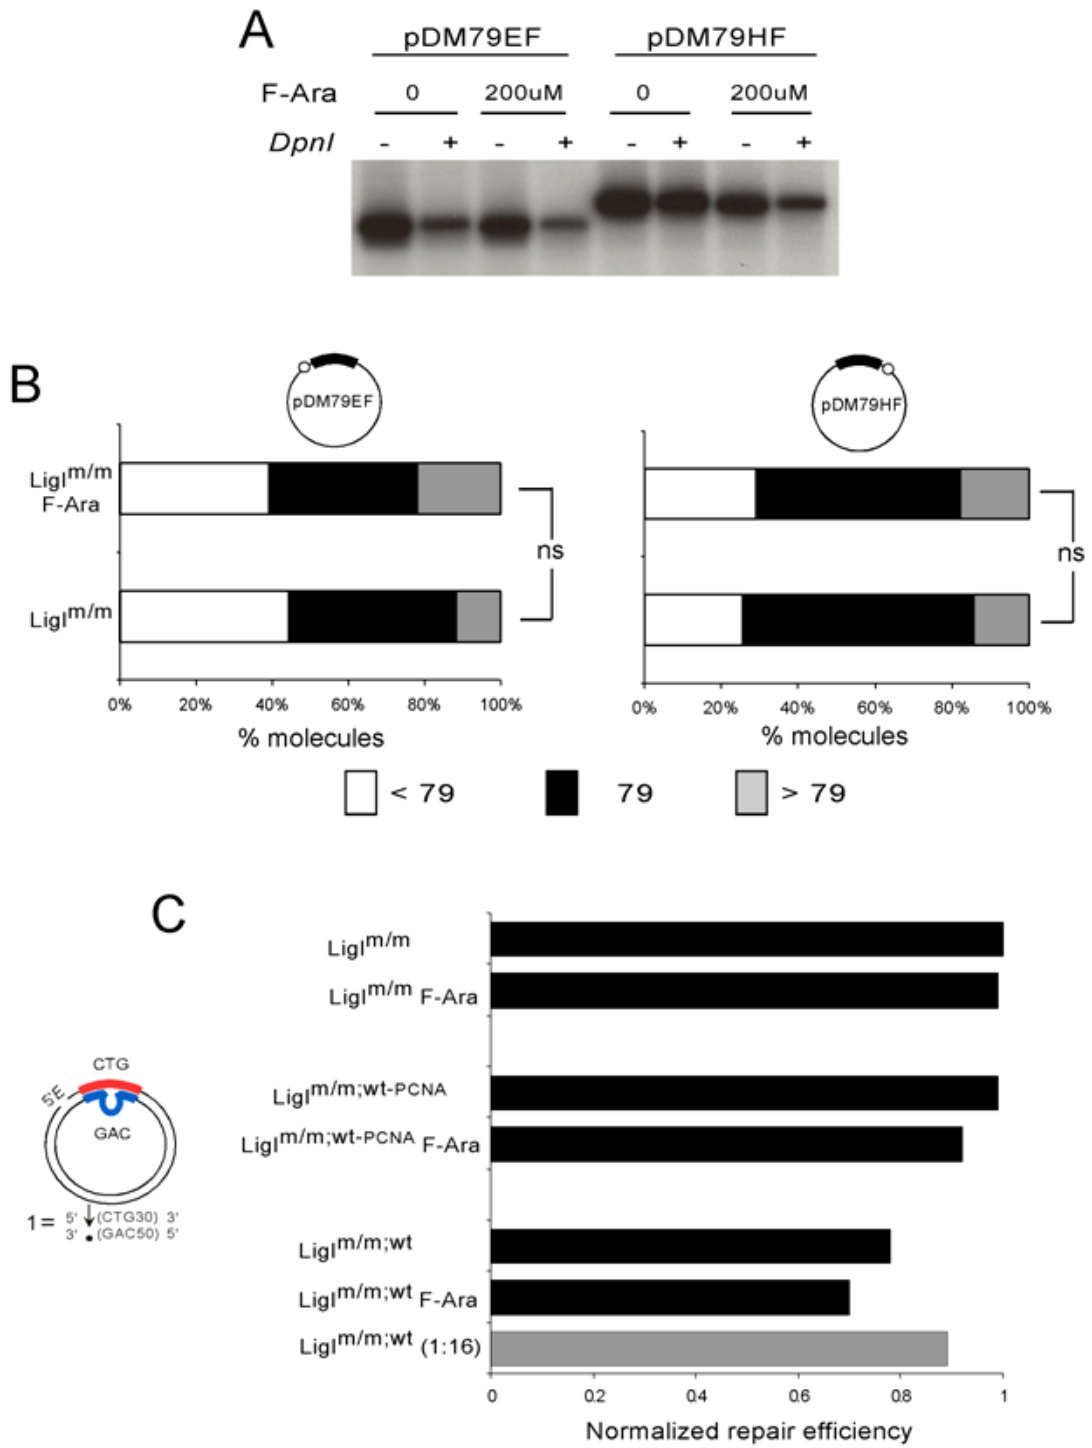

Supplement: supp_M109.034405_jbc.M109.034405-1.pdf [file supp_M109.034405_jbc.M109.034405-1.pdf]
